# Supplementary material
Source: publisher site journal article supplement (https://www.spandidos-publications.com/3043/downloadSupplementary)
Supplement: Supplementary file 1 [file downloadSupplementary]

## Sheet: DATA
Table SII. Clinical data of the patients from The Cancer Genome Atlas.
Sample	Patient	Cancer type	Age, years	Sex	Ethnicity			Histological type		Pathologic diagnosis date		Vital status	Tumor status		New tumor event type	New tumor event site	New tumor event site other		Margin status	Residual tumor	OS	OS time, days	DSS	DSS time, days	DFI	DFI time, days	PFI	PFI time, days
TCGA-3B-A9HI-01	TCGA-3B-A9HI	SARC	68	MALE	WHITE			Dedifferentiated liposarcoma		2009		Alive	WITH TUMOR		Locoregional Recurrence				Positive	R1	0	1521	0	1521	NA	NA	1	606
TCGA-3B-A9HJ-01	TCGA-3B-A9HJ	SARC	68	MALE	WHITE			Dedifferentiated liposarcoma		2011		Alive	TUMOR FREE						[Unknown]	RX	0	1104	0	1104	NA	NA	0	1104
TCGA-3B-A9HL-01	TCGA-3B-A9HL	SARC	67	MALE	WHITE			Dedifferentiated liposarcoma		2011		Dead	TUMOR FREE		Locoregional Recurrence	Other, specify	Retroperitoneum		Positive	R1	1	599	0	599	NA	NA	1	229
TCGA-3B-A9HO-01	TCGA-3B-A9HO	SARC	75	MALE	WHITE			Dedifferentiated liposarcoma		2012		Alive	TUMOR FREE		New Primary Tumor	Other, specify	Abdominal Wall		Positive	R1	0	959	0	959	NA	NA	1	595
TCGA-3B-A9HP-01	TCGA-3B-A9HP	SARC	57	FEMALE	WHITE			Leiomyosarcoma (LMS)		2007		Dead	WITH TUMOR		Distant Metastasis	Lung			Positive	R1	1	1627	1	1627	NA	NA	1	517
TCGA-3B-A9HQ-01	TCGA-3B-A9HQ	SARC	66	FEMALE	WHITE			Leiomyosarcoma (LMS)		2007		Alive							Negative	R0	0	2085	0	2085	0	2085	0	2085
TCGA-3B-A9HR-01	TCGA-3B-A9HR	SARC	38	FEMALE	BLACK OR AFRICAN AMERICAN			Leiomyosarcoma (LMS)		2007		Dead	WITH TUMOR		Distant Metastasis	Lung			Negative	R0	1	2694	1	2694	1	496	1	496
TCGA-3B-A9HS-01	TCGA-3B-A9HS	SARC	60	MALE	WHITE			Leiomyosarcoma (LMS)		2008		Dead	WITH TUMOR		Locoregional Recurrence				Negative	R0	1	1366	1	1366	1	139	1	139
TCGA-3B-A9HT-01	TCGA-3B-A9HT	SARC	53	MALE	WHITE			Leiomyosarcoma (LMS)		2010		Alive	TUMOR FREE		New Primary Tumor	Liver			Negative	R0	0	1665	0	1665	0	1665	1	670
TCGA-3B-A9HU-01	TCGA-3B-A9HU	SARC	53	FEMALE	BLACK OR AFRICAN AMERICAN			Leiomyosarcoma (LMS)		2010		Alive	WITH TUMOR		Distant Metastasis	Lung			Negative	R0	0	768	0	768	1	631	1	631
TCGA-3B-A9HV-01	TCGA-3B-A9HV	SARC	48	FEMALE	WHITE			Leiomyosarcoma (LMS)		2010		Dead	WITH TUMOR		Distant Metastasis	Lung			Negative	RX	1	437	1	437	NA	NA	1	41
TCGA-3B-A9HX-01	TCGA-3B-A9HX	SARC	70	FEMALE	WHITE			Leiomyosarcoma (LMS)		2011		Alive	TUMOR FREE						Negative	R0	0	1303	0	1303	0	1303	0	1303
TCGA-3B-A9HY-01	TCGA-3B-A9HY	SARC	49	MALE	WHITE			Leiomyosarcoma (LMS)		2011		Alive	TUMOR FREE						Negative	R0	0	314	0	314	0	314	0	314
TCGA-3B-A9HZ-01	TCGA-3B-A9HZ	SARC	66	MALE	WHITE			Leiomyosarcoma (LMS)		2011		Alive	WITH TUMOR		Distant Metastasis	Lung			Positive	R1	0	1170	0	1170	NA	NA	1	309
TCGA-3B-A9I0-01	TCGA-3B-A9I0	SARC	33	MALE	WHITE			Leiomyosarcoma (LMS)		2011		Alive	WITH TUMOR		Distant Metastasis	Liver			Negative	R0	0	1096	0	1096	1	503	1	503
TCGA-3B-A9I1-01	TCGA-3B-A9I1	SARC	56	FEMALE	BLACK OR AFRICAN AMERICAN			Leiomyosarcoma (LMS)		2012		Dead	WITH TUMOR		Distant Metastasis	Other, specify	Pelvis		Negative	RX	1	567	1	567	NA	NA	1	192
TCGA-3B-A9I3-01	TCGA-3B-A9I3	SARC	62	MALE	WHITE			Leiomyosarcoma (LMS)		2012		Alive	TUMOR FREE		New Primary Tumor	Other, specify	Axillary Lymph Node		Positive	R1	0	808	0	808	NA	NA	1	87
TCGA-3R-A8YX-01	TCGA-3R-A8YX	SARC	66	MALE	[Not Evaluated]			Dedifferentiated liposarcoma		2013		Dead	WITH TUMOR						Positive	R2	1	17	1	17	NA	NA	1	17
TCGA-DX-A1KU-01	TCGA-DX-A1KU	SARC	82	MALE	WHITE			Dedifferentiated liposarcoma		2010		Dead	WITH TUMOR		Distant Metastasis	Other, specify	Abdomen			R2	1	427	1	427	NA	NA	1	94
TCGA-DX-A1KW-01	TCGA-DX-A1KW	SARC	67	MALE	WHITE			Dedifferentiated liposarcoma		2009		Dead								R1	1	995	NA	995	NA	NA	0	995
TCGA-DX-A1KX-01	TCGA-DX-A1KX	SARC	67	FEMALE	WHITE			Dedifferentiated liposarcoma		2009		Alive	TUMOR FREE							R0	0	2087	0	2087	0	2087	0	2087
TCGA-DX-A1KY-01	TCGA-DX-A1KY	SARC	66	MALE	WHITE			Dedifferentiated liposarcoma		2009		Dead	WITH TUMOR		Distant Metastasis					R1	1	391	1	391	NA	NA	1	205
TCGA-DX-A1KZ-01	TCGA-DX-A1KZ	SARC	66	MALE	WHITE			Dedifferentiated liposarcoma		2009		Alive	WITH TUMOR		Locoregional Recurrence	Other, specify				R1	0	1372	0	1372	NA	NA	1	1294
TCGA-DX-A1L0-01	TCGA-DX-A1L0	SARC	58	MALE	WHITE			Dedifferentiated liposarcoma		2008		Dead	WITH TUMOR		Locoregional Recurrence					R1	1	564	1	564	NA	NA	1	103
TCGA-DX-A1L1-01	TCGA-DX-A1L1	SARC	60	MALE	WHITE			Dedifferentiated liposarcoma		2008		Dead	WITH TUMOR		Locoregional Recurrence					R0	1	1649	1	1649	1	349	1	349
TCGA-DX-A1L2-01	TCGA-DX-A1L2	SARC	78	MALE	WHITE			Dedifferentiated liposarcoma		2008		Alive	WITH TUMOR		Locoregional Recurrence					R0	0	2586	0	2586	1	1480	1	1480
TCGA-DX-A1L3-01	TCGA-DX-A1L3	SARC	60	FEMALE	WHITE			Dedifferentiated liposarcoma		2009		Dead	WITH TUMOR		Locoregional Recurrence					R1	1	1020	1	1020	NA	NA	1	437
TCGA-DX-A1L4-01	TCGA-DX-A1L4	SARC	60	MALE	WHITE			Dedifferentiated liposarcoma		2009		Alive	WITH TUMOR		Locoregional Recurrence					R0	0	2036	0	2036	1	340	1	340
TCGA-DX-A23R-01	TCGA-DX-A23R	SARC	55	FEMALE	WHITE			Dedifferentiated liposarcoma		2002		Alive	TUMOR FREE							R1	0	2271	0	2271	NA	NA	0	2271
TCGA-DX-A23T-01	TCGA-DX-A23T	SARC	40	FEMALE	WHITE			Dedifferentiated liposarcoma		2006		Dead	WITH TUMOR		Locoregional Recurrence					R1	1	160	1	160	NA	NA	1	104
TCGA-DX-A23U-01	TCGA-DX-A23U	SARC	81	MALE	WHITE			Dedifferentiated liposarcoma		2003		Dead	WITH TUMOR		Locoregional Recurrence					R1	1	2324	1	2324	NA	NA	1	873
TCGA-DX-A23V-01	TCGA-DX-A23V	SARC	57	FEMALE	WHITE			Dedifferentiated liposarcoma		2003		Dead	WITH TUMOR		Locoregional Recurrence					R1	1	2034	1	2034	NA	NA	1	378
TCGA-DX-A23Y-01	TCGA-DX-A23Y	SARC	80	MALE	WHITE			Dedifferentiated liposarcoma		2006		Dead	WITH TUMOR		Locoregional Recurrence					R1	1	191	1	191	NA	NA	1	172
TCGA-DX-A23Z-01	TCGA-DX-A23Z	SARC	74	MALE	WHITE			Dedifferentiated liposarcoma		2006		Dead	WITH TUMOR		Locoregional Recurrence					R1	1	846	1	846	NA	NA	1	751
TCGA-DX-A240-01	TCGA-DX-A240	SARC	51	MALE	WHITE			Dedifferentiated liposarcoma		2006		Alive	TUMOR FREE							R0	0	1834	0	1834	0	1834	0	1834
TCGA-DX-A2IZ-01	TCGA-DX-A2IZ	SARC	60	MALE	WHITE			Dedifferentiated liposarcoma		2007		Alive	TUMOR FREE						Negative	R0	0	261	0	261	0	261	0	261
TCGA-DX-A2J0-01	TCGA-DX-A2J0	SARC	61	MALE	WHITE			Dedifferentiated liposarcoma		2005		Dead	WITH TUMOR		Locoregional Recurrence					R1	1	295	1	295	NA	NA	1	213
TCGA-DX-A2J1-01	TCGA-DX-A2J1	SARC	53	MALE	WHITE			Dedifferentiated liposarcoma		2007		Alive	TUMOR FREE						Positive	R1	0	2901	0	2901	NA	NA	0	2901
TCGA-DX-A2J4-01	TCGA-DX-A2J4	SARC	60	MALE	WHITE			Dedifferentiated liposarcoma		2008		Alive	TUMOR FREE							R0	0	2408	0	2408	0	2408	0	2408
TCGA-DX-A3LS-01	TCGA-DX-A3LS	SARC	78	FEMALE	WHITE			Dedifferentiated liposarcoma		2011		Dead	WITH TUMOR		Distant Metastasis	Lung				R1	1	275	1	275	NA	NA	1	114
TCGA-DX-A3LT-01	TCGA-DX-A3LT	SARC	62	MALE	WHITE			Dedifferentiated liposarcoma		2011		Alive	WITH TUMOR		Locoregional Recurrence				Negative	R0	0	1492	0	1492	1	568	1	568
TCGA-DX-A3LU-01	TCGA-DX-A3LU	SARC	60	MALE	WHITE			Dedifferentiated liposarcoma		2007		Alive	TUMOR FREE		Locoregional Recurrence	Other, specify	Retroperitoneum		Positive	R1	0	2641	0	2641	NA	NA	1	290
TCGA-DX-A3LW-01	TCGA-DX-A3LW	SARC	43	MALE	WHITE			Dedifferentiated liposarcoma		2004		Alive	WITH TUMOR		Locoregional Recurrence				Positive	R1	0	4150	0	4150	NA	NA	1	1125
TCGA-DX-A3LY-01	TCGA-DX-A3LY	SARC	66	MALE	WHITE			Dedifferentiated liposarcoma		2011		Alive	TUMOR FREE						Negative	R0	0	1017	0	1017	0	1017	0	1017
TCGA-DX-A3M1-01	TCGA-DX-A3M1	SARC	79	MALE	WHITE			Dedifferentiated liposarcoma		2010		Alive	WITH TUMOR		Locoregional Recurrence	Other, specify	Retroperitoneum		Positive	R2	0	1359	0	1359	NA	NA	1	1212
TCGA-DX-A3M2-01	TCGA-DX-A3M2	SARC	59	MALE	WHITE			Dedifferentiated liposarcoma		2011		Alive	WITH TUMOR						Positive	R1	0	1055	0	1055	NA	NA	0	1055
TCGA-DX-A3U5-01	TCGA-DX-A3U5	SARC	52	MALE	WHITE			Dedifferentiated liposarcoma		2011		Alive	TUMOR FREE						Positive	R1	0	969	0	969	NA	NA	0	969
TCGA-DX-A3U6-01	TCGA-DX-A3U6	SARC	63	FEMALE	WHITE			Dedifferentiated liposarcoma		2011		Dead	WITH TUMOR		Locoregional Recurrence				Negative	R0	1	1088	1	1088	1	160	1	160
TCGA-DX-A3U7-01	TCGA-DX-A3U7	SARC	67	MALE	WHITE			Leiomyosarcoma (LMS)		2009		Dead	WITH TUMOR		Distant Metastasis	Lung			Negative	R0	1	1552	1	1552	1	349	1	349
TCGA-DX-A3U8-01	TCGA-DX-A3U8	SARC	43	MALE	[Unknown]			Leiomyosarcoma (LMS)		2010		Dead	WITH TUMOR		Distant Metastasis	Lung				R0	1	138	1	138	1	128	1	128
TCGA-DX-A3U9-01	TCGA-DX-A3U9	SARC	84	MALE	WHITE			Leiomyosarcoma (LMS)		2005		Dead	WITH TUMOR		Locoregional Recurrence					R1	1	456	1	456	NA	NA	1	203
TCGA-DX-A3UA-01	TCGA-DX-A3UA	SARC	47	FEMALE	WHITE			Leiomyosarcoma (LMS)		2009		Dead	[Discrepancy]							R0	1	325	NA	325	0	325	0	325
TCGA-DX-A3UB-01	TCGA-DX-A3UB	SARC	54	MALE	WHITE			Leiomyosarcoma (LMS)		2009		Alive	TUMOR FREE						Negative	R0	0	2247	0	2247	0	2247	0	2247
TCGA-DX-A3UC-01	TCGA-DX-A3UC	SARC	37	FEMALE	WHITE			Leiomyosarcoma (LMS)		2009		Alive	WITH TUMOR		Distant Metastasis	Lung			Negative	R0	0	2085	0	2085	1	176	1	176
TCGA-DX-A3UD-01	TCGA-DX-A3UD	SARC	56	MALE	WHITE			Leiomyosarcoma (LMS)		2010		Alive	WITH TUMOR		Locoregional Recurrence				Negative	R0	0	1534	0	1534	1	603	1	603
TCGA-DX-A3UE-01	TCGA-DX-A3UE	SARC	66	FEMALE	WHITE			Leiomyosarcoma (LMS)		2007		Dead	WITH TUMOR		Distant Metastasis					R0	1	1061	1	1061	1	224	1	224
TCGA-DX-A3UF-01	TCGA-DX-A3UF	SARC	65	FEMALE	WHITE			Leiomyosarcoma (LMS)		2007		Dead	WITH TUMOR		Locoregional Recurrence				Positive	R1	1	2599	1	2599	NA	NA	1	964
TCGA-DX-A48J-01	TCGA-DX-A48J	SARC	44	MALE	BLACK OR AFRICAN AMERICAN			Leiomyosarcoma (LMS)		2003		Dead	WITH TUMOR		Locoregional Recurrence					R0	1	296	1	296	1	97	1	97
TCGA-DX-A48K-01	TCGA-DX-A48K	SARC	65	MALE	WHITE			Leiomyosarcoma (LMS)		2011		Alive	TUMOR FREE						Negative	R0	0	1399	0	1399	0	1399	0	1399
TCGA-DX-A48L-01	TCGA-DX-A48L	SARC	49	FEMALE	WHITE			Leiomyosarcoma (LMS)		2010		Dead	WITH TUMOR		Distant Metastasis	Lung				R0	1	738	1	738	1	316	1	316
TCGA-DX-A48N-01	TCGA-DX-A48N	SARC	47	MALE	WHITE			Dedifferentiated liposarcoma		2012		Alive	TUMOR FREE						Positive	R1	0	1073	0	1073	NA	NA	0	1073
TCGA-DX-A48O-01	TCGA-DX-A48O	SARC	63	FEMALE	WHITE			Leiomyosarcoma (LMS)		2010		Alive	TUMOR FREE						Negative	R0	0	1605	0	1605	0	1605	0	1605
TCGA-DX-A48P-01	TCGA-DX-A48P	SARC	54	FEMALE	WHITE			Leiomyosarcoma (LMS)		2011		Alive	TUMOR FREE						Negative	R0	0	1400	0	1400	0	1400	0	1400
TCGA-DX-A48R-01	TCGA-DX-A48R	SARC	41	MALE	WHITE			Leiomyosarcoma (LMS)		2002		Alive	WITH TUMOR		Locoregional Recurrence				Positive	R1	0	805	0	805	NA	NA	1	315
TCGA-DX-A48U-01	TCGA-DX-A48U	SARC	57	MALE	WHITE			Leiomyosarcoma (LMS)		2005		Alive	TUMOR FREE						Negative	R0	0	3310	0	3310	0	3310	0	3310
TCGA-DX-A48V-01	TCGA-DX-A48V	SARC	78	MALE	WHITE			Leiomyosarcoma (LMS)		2010		Alive	TUMOR FREE		Distant Metastasis	Other, specify	Flank		Negative	R0	0	1820	0	1820	1	1407	1	1407
TCGA-DX-A6B7-01	TCGA-DX-A6B7	SARC	55	MALE	WHITE			Leiomyosarcoma (LMS)		2012		Alive	TUMOR FREE						Negative	R0	0	1143	0	1143	0	1143	0	1143
TCGA-DX-A6B8-01	TCGA-DX-A6B8	SARC	80	MALE	WHITE			Leiomyosarcoma (LMS)		2002		Dead	WITH TUMOR		Distant Metastasis	Lung			Positive	R0	1	485	1	485	1	42	1	42
TCGA-DX-A6B9-01	TCGA-DX-A6B9	SARC	45	FEMALE	BLACK OR AFRICAN AMERICAN			Leiomyosarcoma (LMS)		2012		Alive	TUMOR FREE						Negative	R0	0	1138	0	1138	0	1138	0	1138
TCGA-DX-A6BA-01	TCGA-DX-A6BA	SARC	53	FEMALE	WHITE			Leiomyosarcoma (LMS)		2008		Alive	WITH TUMOR		Locoregional Recurrence				Negative	R0	0	2515	0	2515	1	408	1	408
TCGA-DX-A6BB-01	TCGA-DX-A6BB	SARC	74	MALE	WHITE			Leiomyosarcoma (LMS)		2012		Alive	WITH TUMOR						Positive	R1	0	1105	0	1105	NA	NA	0	1105
TCGA-DX-A6BE-01	TCGA-DX-A6BE	SARC	77	MALE	WHITE			Dedifferentiated liposarcoma		2011		Alive	TUMOR FREE						Negative	R0	0	881	0	881	0	881	0	881
TCGA-DX-A6BF-01	TCGA-DX-A6BF	SARC	82	FEMALE	WHITE			Dedifferentiated liposarcoma		2012		Alive	WITH TUMOR		Locoregional Recurrence	Other, specify			Positive	R1	0	972	0	972	NA	NA	1	947
TCGA-DX-A6BG-01	TCGA-DX-A6BG	SARC	51	MALE	WHITE			Dedifferentiated liposarcoma		2012		Alive	WITH TUMOR		Locoregional Recurrence				Negative	R0	0	1121	0	1121	1	149	1	149
TCGA-DX-A6BH-01	TCGA-DX-A6BH	SARC	34	MALE	WHITE			Dedifferentiated liposarcoma		2012		Alive	WITH TUMOR		Locoregional Recurrence				Positive	R1	0	821	0	821	NA	NA	1	232
TCGA-DX-A6BK-01	TCGA-DX-A6BK	SARC	85	FEMALE	WHITE			Dedifferentiated liposarcoma		2009		Dead	TUMOR FREE						Positive	R1	1	492	0	492	NA	NA	0	492
TCGA-DX-A6YQ-01	TCGA-DX-A6YQ	SARC	86	FEMALE	[Unknown]			Myxofibrosarcoma		2011		Dead	TUMOR FREE						Negative	R0	1	93	0	93	0	93	0	93
TCGA-DX-A6YR-01	TCGA-DX-A6YR	SARC	75	MALE	WHITE			Myxofibrosarcoma		2011		Alive	TUMOR FREE						Negative	R0	0	1247	0	1247	0	1247	0	1247
TCGA-DX-A6YS-01	TCGA-DX-A6YS	SARC	61	MALE	WHITE			Myxofibrosarcoma		2008		Alive	TUMOR FREE						Negative	R0	0	2381	0	2381	0	2381	0	2381
TCGA-DX-A6YT-01	TCGA-DX-A6YT	SARC	31	FEMALE	WHITE			Myxofibrosarcoma		2008		Alive	TUMOR FREE						Negative	R0	0	2044	0	2044	0	2044	0	2044
TCGA-DX-A6YU-01	TCGA-DX-A6YU	SARC	50	FEMALE	WHITE			Myxofibrosarcoma		2012		Alive	TUMOR FREE						Negative	R0	0	1045	0	1045	0	1045	0	1045
TCGA-DX-A6YV-01	TCGA-DX-A6YV	SARC	74	MALE	WHITE			Myxofibrosarcoma		2008		Dead	WITH TUMOR		Distant Metastasis	Other, specify	Groin - lymph nodes		Negative	R0	1	1536	1	1536	1	516	1	516
TCGA-DX-A6YX-01	TCGA-DX-A6YX	SARC	68	FEMALE	[Unknown]			Myxofibrosarcoma		2005		Dead	WITH TUMOR		Distant Metastasis	Lung			Negative	R0	1	513	1	513	1	200	1	200
TCGA-DX-A6YZ-01	TCGA-DX-A6YZ	SARC	59	MALE	WHITE			Myxofibrosarcoma		2007		Alive	TUMOR FREE						Negative	R0	0	2625	0	2625	0	2625	0	2625
TCGA-DX-A6Z0-01	TCGA-DX-A6Z0	SARC	78	FEMALE	WHITE			Myxofibrosarcoma		2006		Dead	TUMOR FREE						Positive	R1	1	1953	0	1953	NA	NA	0	1953
TCGA-DX-A6Z2-01	TCGA-DX-A6Z2	SARC	82	FEMALE	WHITE			Leiomyosarcoma (LMS)		2007		Alive	WITH TUMOR		Distant Metastasis	Lung			Positive	R0	0	3079	0	3079	1	2659	1	2659
TCGA-DX-A7EF-01	TCGA-DX-A7EF	SARC	88	FEMALE	WHITE			Pleomorphic 'MFH' / Undifferentiated pleomorphic sarcoma		2005		Dead	WITH TUMOR		Distant Metastasis	Lung			Positive	R0	1	648	1	648	1	294	1	294
TCGA-DX-A3UF-01	TCGA-DX-A3UF	SARC	65	FEMALE	WHITE			Leiomyosarcoma (LMS)		2007		Dead	WITH TUMOR		Locoregional Recurrence				Positive	R1	1	2599	1	2599	NA	NA	1	964
TCGA-DX-A48J-01	TCGA-DX-A48J	SARC	44	MALE	BLACK OR AFRICAN AMERICAN			Leiomyosarcoma (LMS)		2003		Dead	WITH TUMOR		Locoregional Recurrence					R0	1	296	1	296	1	97	1	97
TCGA-DX-A48K-01	TCGA-DX-A48K	SARC	65	MALE	WHITE			Leiomyosarcoma (LMS)		2011		Alive	TUMOR FREE						Negative	R0	0	1399	0	1399	0	1399	0	1399
TCGA-DX-A48L-01	TCGA-DX-A48L	SARC	49	FEMALE	WHITE			Leiomyosarcoma (LMS)		2010		Dead	WITH TUMOR		Distant Metastasis	Lung				R0	1	738	1	738	1	316	1	316
TCGA-DX-A48N-01	TCGA-DX-A48N	SARC	47	MALE	WHITE			Dedifferentiated liposarcoma		2012		Alive	TUMOR FREE						Positive	R1	0	1073	0	1073	NA	NA	0	1073
TCGA-DX-A48O-01	TCGA-DX-A48O	SARC	63	FEMALE	WHITE			Leiomyosarcoma (LMS)		2010		Alive	TUMOR FREE						Negative	R0	0	1605	0	1605	0	1605	0	1605
TCGA-DX-A48P-01	TCGA-DX-A48P	SARC	54	FEMALE	WHITE			Leiomyosarcoma (LMS)		2011		Alive	TUMOR FREE						Negative	R0	0	1400	0	1400	0	1400	0	1400
TCGA-DX-A48R-01	TCGA-DX-A48R	SARC	41	MALE	WHITE			Leiomyosarcoma (LMS)		2002		Alive	WITH TUMOR		Locoregional Recurrence				Positive	R1	0	805	0	805	NA	NA	1	315
TCGA-DX-A48U-01	TCGA-DX-A48U	SARC	57	MALE	WHITE			Leiomyosarcoma (LMS)		2005		Alive	TUMOR FREE						Negative	R0	0	3310	0	3310	0	3310	0	3310
TCGA-DX-A48V-01	TCGA-DX-A48V	SARC	78	MALE	WHITE			Leiomyosarcoma (LMS)		2010		Alive	TUMOR FREE		Distant Metastasis	Other, specify	Flank		Negative	R0	0	1820	0	1820	1	1407	1	1407
TCGA-DX-A6B7-01	TCGA-DX-A6B7	SARC	55	MALE	WHITE			Leiomyosarcoma (LMS)		2012		Alive	TUMOR FREE						Negative	R0	0	1143	0	1143	0	1143	0	1143
TCGA-DX-A6B8-01	TCGA-DX-A6B8	SARC	80	MALE	WHITE			Leiomyosarcoma (LMS)		2002		Dead	WITH TUMOR		Distant Metastasis	Lung			Positive	R0	1	485	1	485	1	42	1	42
TCGA-DX-A6B9-01	TCGA-DX-A6B9	SARC	45	FEMALE	BLACK OR AFRICAN AMERICAN			Leiomyosarcoma (LMS)		2012		Alive	TUMOR FREE						Negative	R0	0	1138	0	1138	0	1138	0	1138
TCGA-DX-A6BA-01	TCGA-DX-A6BA	SARC	53	FEMALE	WHITE			Leiomyosarcoma (LMS)		2008		Alive	WITH TUMOR		Locoregional Recurrence				Negative	R0	0	2515	0	2515	1	408	1	408
TCGA-DX-A6BB-01	TCGA-DX-A6BB	SARC	74	MALE	WHITE			Leiomyosarcoma (LMS)		2012		Alive	WITH TUMOR						Positive	R1	0	1105	0	1105	NA	NA	0	1105
TCGA-DX-A6BE-01	TCGA-DX-A6BE	SARC	77	MALE	WHITE			Dedifferentiated liposarcoma		2011		Alive	TUMOR FREE						Negative	R0	0	881	0	881	0	881	0	881
TCGA-DX-A6BF-01	TCGA-DX-A6BF	SARC	82	FEMALE	WHITE			Dedifferentiated liposarcoma		2012		Alive	WITH TUMOR		Locoregional Recurrence	Other, specify			Positive	R1	0	972	0	972	NA	NA	1	947
TCGA-DX-A6BG-01	TCGA-DX-A6BG	SARC	51	MALE	WHITE			Dedifferentiated liposarcoma		2012		Alive	WITH TUMOR		Locoregional Recurrence				Negative	R0	0	1121	0	1121	1	149	1	149
TCGA-DX-A6BH-01	TCGA-DX-A6BH	SARC	34	MALE	WHITE			Dedifferentiated liposarcoma		2012		Alive	WITH TUMOR		Locoregional Recurrence				Positive	R1	0	821	0	821	NA	NA	1	232
TCGA-DX-A6BK-01	TCGA-DX-A6BK	SARC	85	FEMALE	WHITE			Dedifferentiated liposarcoma		2009		Dead	TUMOR FREE						Positive	R1	1	492	0	492	NA	NA	0	492
TCGA-DX-A6YQ-01	TCGA-DX-A6YQ	SARC	86	FEMALE	[Unknown]			Myxofibrosarcoma		2011		Dead	TUMOR FREE						Negative	R0	1	93	0	93	0	93	0	93
TCGA-DX-A6YR-01	TCGA-DX-A6YR	SARC	75	MALE	WHITE			Myxofibrosarcoma		2011		Alive	TUMOR FREE						Negative	R0	0	1247	0	1247	0	1247	0	1247
TCGA-DX-A6YS-01	TCGA-DX-A6YS	SARC	61	MALE	WHITE			Myxofibrosarcoma		2008		Alive	TUMOR FREE						Negative	R0	0	2381	0	2381	0	2381	0	2381
TCGA-DX-A6YT-01	TCGA-DX-A6YT	SARC	31	FEMALE	WHITE			Myxofibrosarcoma		2008		Alive	TUMOR FREE						Negative	R0	0	2044	0	2044	0	2044	0	2044
TCGA-DX-A6YU-01	TCGA-DX-A6YU	SARC	50	FEMALE	WHITE			Myxofibrosarcoma		2012		Alive	TUMOR FREE						Negative	R0	0	1045	0	1045	0	1045	0	1045
TCGA-DX-A6YV-01	TCGA-DX-A6YV	SARC	74	MALE	WHITE			Myxofibrosarcoma		2008		Dead	WITH TUMOR		Distant Metastasis	Other, specify	Groin - lymph nodes		Negative	R0	1	1536	1	1536	1	516	1	516
TCGA-DX-A6YX-01	TCGA-DX-A6YX	SARC	68	FEMALE	[Unknown]			Myxofibrosarcoma		2005		Dead	WITH TUMOR		Distant Metastasis	Lung			Negative	R0	1	513	1	513	1	200	1	200
TCGA-DX-A6YZ-01	TCGA-DX-A6YZ	SARC	59	MALE	WHITE			Myxofibrosarcoma		2007		Alive	TUMOR FREE						Negative	R0	0	2625	0	2625	0	2625	0	2625
TCGA-DX-A6Z0-01	TCGA-DX-A6Z0	SARC	78	FEMALE	WHITE			Myxofibrosarcoma		2006		Dead	TUMOR FREE						Positive	R1	1	1953	0	1953	NA	NA	0	1953
TCGA-DX-A6Z2-01	TCGA-DX-A6Z2	SARC	82	FEMALE	WHITE			Leiomyosarcoma (LMS)		2007		Alive	WITH TUMOR		Distant Metastasis	Lung			Positive	R0	0	3079	0	3079	1	2659	1	2659
TCGA-DX-A7EF-01	TCGA-DX-A7EF	SARC	88	FEMALE	WHITE			Pleomorphic 'MFH' / Undifferentiated pleomorphic sarcoma		2005		Dead	WITH TUMOR		Distant Metastasis	Lung			Positive	R0	1	648	1	648	1	294	1	294
TCGA-DX-A7EI-01	TCGA-DX-A7EI	SARC	78	FEMALE	WHITE			Dedifferentiated liposarcoma		2003		Dead	WITH TUMOR		Locoregional Recurrence	Other, specify	Retroperitoneum		Positive	R1	1	1049	1	1049	NA	NA	1	828
TCGA-DX-A7EL-01	TCGA-DX-A7EL	SARC	56	FEMALE	WHITE			Leiomyosarcoma (LMS)		2007		Alive	TUMOR FREE		Distant Metastasis	Lung			Positive	R0	0	2291	0	2291	1	2249	1	2249
TCGA-DX-A7EM-01	TCGA-DX-A7EM	SARC	61	MALE	WHITE			Leiomyosarcoma (LMS)		2010		Alive	TUMOR FREE						Positive	R0	0	1892	0	1892	0	1892	0	1892
TCGA-DX-A7EN-01	TCGA-DX-A7EN	SARC	53	FEMALE	WHITE			Leiomyosarcoma (LMS)		2012		Alive	WITH TUMOR		Distant Metastasis	Lung			Positive	R0	0	923	0	923	1	352	1	352
TCGA-DX-A7EO-01	TCGA-DX-A7EO	SARC	20	FEMALE	WHITE			Synovial Sarcoma - Biphasic		2002		Alive	TUMOR FREE						Negative	R0	0	4627	0	4627	0	4627	0	4627
TCGA-DX-A7EQ-01	TCGA-DX-A7EQ	SARC	72	MALE	WHITE			Synovial Sarcoma - Monophasic		2006		Dead	WITH TUMOR		Distant Metastasis	Lung			Negative	R0	1	897	1	897	1	251	1	251
TCGA-DX-A7ER-01	TCGA-DX-A7ER	SARC	69	MALE	WHITE			Synovial Sarcoma - Monophasic		2008		Dead	TUMOR FREE						Negative	R0	1	1466	0	1466	0	1466	0	1466
TCGA-DX-A7ES-01	TCGA-DX-A7ES	SARC	50	FEMALE	WHITE			Dedifferentiated liposarcoma		2013		Alive	TUMOR FREE						Positive	R0	0	610	0	610	0	610	0	610
TCGA-DX-A7ET-01	TCGA-DX-A7ET	SARC	71	MALE	BLACK OR AFRICAN AMERICAN			Pleomorphic 'MFH' / Undifferentiated pleomorphic sarcoma		2013		Alive	TUMOR FREE						Negative	R0	0	463	0	463	0	463	0	463
TCGA-DX-A7EU-01	TCGA-DX-A7EU	SARC	79	FEMALE	WHITE			Myxofibrosarcoma		2013		Alive	TUMOR FREE						Negative	R0	0	721	0	721	0	721	0	721
TCGA-DX-A8BG-01	TCGA-DX-A8BG	SARC	83	FEMALE	WHITE			Myxofibrosarcoma		2013		Alive	TUMOR FREE		Distant Metastasis	Lung			Negative	R0	0	546	0	546	1	330	1	330
TCGA-DX-A8BH-01	TCGA-DX-A8BH	SARC	86	MALE	WHITE			Pleomorphic 'MFH' / Undifferentiated pleomorphic sarcoma		2013		Dead	WITH TUMOR		Distant Metastasis	Other, specify	Pleura		Positive	R0	1	439	1	439	1	272	1	272
TCGA-DX-A8BJ-01	TCGA-DX-A8BJ	SARC	76	MALE	WHITE			Pleomorphic 'MFH' / Undifferentiated pleomorphic sarcoma		2011		Dead	TUMOR FREE						Negative	R0	1	284	0	284	0	284	0	284
TCGA-DX-A8BK-01	TCGA-DX-A8BK	SARC	61	FEMALE	WHITE			Pleomorphic 'MFH' / Undifferentiated pleomorphic sarcoma		2009		Alive	TUMOR FREE						Negative	R0	0	1885	0	1885	0	1885	0	1885
TCGA-DX-A8BL-01	TCGA-DX-A8BL	SARC	59	MALE	WHITE			Pleomorphic 'MFH' / Undifferentiated pleomorphic sarcoma		2011		Alive	TUMOR FREE						Negative	R0	0	1373	0	1373	0	1373	0	1373
TCGA-DX-A8BM-01	TCGA-DX-A8BM	SARC	60	MALE	WHITE			Pleomorphic 'MFH' / Undifferentiated pleomorphic sarcoma		2011		Alive	TUMOR FREE						Negative	R0	0	1456	0	1456	0	1456	0	1456
TCGA-DX-A8BN-01	TCGA-DX-A8BN	SARC	78	FEMALE	WHITE			Pleomorphic 'MFH' / Undifferentiated pleomorphic sarcoma		2011		Alive	TUMOR FREE						Positive	R1	0	1161	0	1161	NA	NA	0	1161
TCGA-DX-A8BO-01	TCGA-DX-A8BO	SARC	67	FEMALE	WHITE			Pleomorphic 'MFH' / Undifferentiated pleomorphic sarcoma		2011		Alive	TUMOR FREE		Locoregional Recurrence	Other, specify	Calf		Positive	R1	0	1240	0	1240	NA	NA	1	333
TCGA-DX-A8BP-01	TCGA-DX-A8BP	SARC	85	MALE	WHITE			Pleomorphic 'MFH' / Undifferentiated pleomorphic sarcoma		2009		Alive	WITH TUMOR		Distant Metastasis	Lung			Positive	R1	0	428	0	428	NA	NA	1	216
TCGA-DX-A8BQ-01	TCGA-DX-A8BQ	SARC	63	MALE	WHITE			Pleomorphic 'MFH' / Undifferentiated pleomorphic sarcoma		2010		Alive	TUMOR FREE						Negative	R0	0	1579	0	1579	0	1579	0	1579
TCGA-DX-A8BR-01	TCGA-DX-A8BR	SARC	63	FEMALE	WHITE			Pleomorphic 'MFH' / Undifferentiated pleomorphic sarcoma		2002		Alive	TUMOR FREE						Negative	R0	0	4573	0	4573	0	4573	0	4573
TCGA-DX-A8BS-01	TCGA-DX-A8BS	SARC	68	FEMALE	BLACK OR AFRICAN AMERICAN			Pleomorphic 'MFH' / Undifferentiated pleomorphic sarcoma		2006		Dead	TUMOR FREE						Positive	R0	1	850	0	850	0	850	0	850
TCGA-DX-A8BT-01	TCGA-DX-A8BT	SARC	63	FEMALE	WHITE			Pleomorphic 'MFH' / Undifferentiated pleomorphic sarcoma		2011		Alive	TUMOR FREE		Locoregional Recurrence	Other, specify	Axilla		Positive	R1	0	1230	0	1230	NA	NA	1	668
TCGA-DX-A8BU-01	TCGA-DX-A8BU	SARC	58	MALE	WHITE			Pleomorphic 'MFH' / Undifferentiated pleomorphic sarcoma		2006		Dead	WITH TUMOR		Distant Metastasis	Lung			Positive	R1	1	1116	1	1116	NA	NA	1	107
TCGA-DX-A8BV-01	TCGA-DX-A8BV	SARC	57	MALE	WHITE			Myxofibrosarcoma		2004		Dead	WITH TUMOR		Locoregional Recurrence	Other, specify	Retroperitoneum		Negative	R0	1	1845	1	1845	1	357	1	357
TCGA-DX-A8BX-01	TCGA-DX-A8BX	SARC	52	MALE	WHITE			Pleomorphic 'MFH' / Undifferentiated pleomorphic sarcoma		2006		Dead	WITH TUMOR						Negative	R0	1	591	1	591	NA	NA	1	591
TCGA-DX-A8BZ-01	TCGA-DX-A8BZ	SARC	78	FEMALE	BLACK OR AFRICAN AMERICAN			Leiomyosarcoma (LMS)		2013		Dead	WITH TUMOR		Distant Metastasis	Lung			Positive	R0	1	200	1	200	1	90	1	90
TCGA-DX-AATS-01	TCGA-DX-AATS	SARC	72	MALE	WHITE			Pleomorphic 'MFH' / Undifferentiated pleomorphic sarcoma		2008		Dead	TUMOR FREE						Positive	R1	1	35	0	35	NA	NA	0	35
TCGA-DX-AB2E-01	TCGA-DX-AB2E	SARC	60	MALE	WHITE			Myxofibrosarcoma		2013		Alive	WITH TUMOR		Distant Metastasis	Lung			Positive	R0	0	541	0	541	1	132	1	132
TCGA-DX-AB2F-01	TCGA-DX-AB2F	SARC	76	FEMALE	WHITE			Dedifferentiated liposarcoma		2013		Alive	TUMOR FREE						Positive	R0	0	365	0	365	0	365	0	365
TCGA-DX-AB2G-01	TCGA-DX-AB2G	SARC	36	MALE	WHITE			Dedifferentiated liposarcoma		2013		Alive	TUMOR FREE						Negative	R0	0	478	0	478	0	478	0	478
TCGA-DX-AB2H-01	TCGA-DX-AB2H	SARC	80	FEMALE	WHITE			Dedifferentiated liposarcoma		2013		Alive	TUMOR FREE						Negative	R0	0	482	0	482	0	482	0	482
TCGA-DX-AB2J-01	TCGA-DX-AB2J	SARC	71	FEMALE	WHITE			Pleomorphic 'MFH' / Undifferentiated pleomorphic sarcoma		2006		Dead	WITH TUMOR						Positive	R1	1	1235	1	1235	NA	NA	1	1235
TCGA-DX-AB2L-01	TCGA-DX-AB2L	SARC	35	MALE	WHITE			Myxofibrosarcoma		2009		Alive	TUMOR FREE						Positive	R1	0	2007	0	2007	NA	NA	0	2007
TCGA-DX-AB2O-01	TCGA-DX-AB2O	SARC	78	FEMALE	WHITE			Pleomorphic 'MFH' / Undifferentiated pleomorphic sarcoma		2007		Alive	TUMOR FREE						Negative	R0	0	2619	0	2619	0	2619	0	2619
TCGA-DX-AB2P-01	TCGA-DX-AB2P	SARC	79	MALE	WHITE			Pleomorphic 'MFH' / Undifferentiated pleomorphic sarcoma		2005		Dead	WITH TUMOR		Locoregional Recurrence				Negative	R0	1	367	1	367	1	161	1	161
TCGA-DX-AB2Q-01	TCGA-DX-AB2Q	SARC	65	FEMALE	WHITE			Pleomorphic 'MFH' / Undifferentiated pleomorphic sarcoma		2009		Alive	TUMOR FREE		Distant Metastasis	Other, specify	inguinal lymph node		Negative	R0	0	2030	0	2030	1	490	1	490
TCGA-DX-AB2S-01	TCGA-DX-AB2S	SARC	53	FEMALE	WHITE			Myxofibrosarcoma		2005		Alive	TUMOR FREE						Negative	R0	0	280	0	280	0	280	0	280
TCGA-DX-AB2T-01	TCGA-DX-AB2T	SARC	54	FEMALE	BLACK OR AFRICAN AMERICAN			Myxofibrosarcoma		2008		Alive	TUMOR FREE		Distant Metastasis	Lung			Negative	R0	0	2369	0	2369	1	784	1	784
TCGA-DX-AB2V-01	TCGA-DX-AB2V	SARC	81	MALE	WHITE			Myxofibrosarcoma		2006		Alive	TUMOR FREE						Negative	R0	0	3241	0	3241	0	3241	0	3241
TCGA-DX-AB2W-01	TCGA-DX-AB2W	SARC	62	FEMALE	WHITE			Pleomorphic 'MFH' / Undifferentiated pleomorphic sarcoma		2006		Alive	TUMOR FREE						Negative	R0	0	3238	0	3238	0	3238	0	3238
TCGA-DX-AB2X-01	TCGA-DX-AB2X	SARC	73	FEMALE	WHITE			Pleomorphic 'MFH' / Undifferentiated pleomorphic sarcoma		2010		Dead	WITH TUMOR		Locoregional Recurrence				Negative	R0	1	404	1	404	1	111	1	111
TCGA-DX-AB2Z-01	TCGA-DX-AB2Z	SARC	87	FEMALE	WHITE			Pleomorphic 'MFH' / Undifferentiated pleomorphic sarcoma		2010		Alive	TUMOR FREE						Negative	R0	0	1533	0	1533	0	1533	0	1533
TCGA-DX-AB30-01	TCGA-DX-AB30	SARC	53	FEMALE	WHITE			Myxofibrosarcoma		2004		Dead	WITH TUMOR		Distant Metastasis	Lung			Negative	R0	1	695	1	695	1	504	1	504
TCGA-DX-AB32-01	TCGA-DX-AB32	SARC	51	MALE	WHITE			Myxofibrosarcoma		2006		Alive	TUMOR FREE						Negative	R0	0	3102	0	3102	0	3102	0	3102
TCGA-DX-AB35-01	TCGA-DX-AB35	SARC	65	MALE	WHITE			Dedifferentiated liposarcoma		2012		Alive	WITH TUMOR		Locoregional Recurrence	Other, specify	Retroperitoneum		Negative	R0	0	928	0	928	1	284	1	284
TCGA-DX-AB36-01	TCGA-DX-AB36	SARC	86	MALE	WHITE			Dedifferentiated liposarcoma		2008		Dead							Positive	R1	1	1825	NA	1825	NA	NA	0	1825
TCGA-DX-AB37-01	TCGA-DX-AB37	SARC	73	FEMALE	WHITE			Dedifferentiated liposarcoma		2003		Dead							Negative	R0	1	2575	NA	2575	0	2575	0	2575
TCGA-DX-AB3A-01	TCGA-DX-AB3A	SARC	80	MALE	WHITE			Dedifferentiated liposarcoma		2009		Dead	WITH TUMOR		Locoregional Recurrence				Negative	R0	1	978	1	978	1	533	1	533
TCGA-DX-AB3B-01	TCGA-DX-AB3B	SARC	28	FEMALE	WHITE			Synovial Sarcoma - Monophasic		2009		Alive	TUMOR FREE						Negative	R0	0	1548	0	1548	0	1548	0	1548
TCGA-DX-AB3C-01	TCGA-DX-AB3C	SARC	27	MALE	WHITE			Synovial Sarcoma - Monophasic		2008		Alive	WITH TUMOR		Distant Metastasis	Lung			Positive	R0	0	2169	0	2169	1	567	1	567
TCGA-FX-A2QS-01	TCGA-FX-A2QS	SARC	61	FEMALE	WHITE			Dedifferentiated liposarcoma		2011		Alive	TUMOR FREE						Negative	R0	0	1495	0	1495	0	1495	0	1495
TCGA-FX-A2QS-11	TCGA-FX-A2QS	SARC	61	FEMALE	WHITE			Dedifferentiated liposarcoma		2011		Alive	TUMOR FREE						Negative	R0	0	1495	0	1495	0	1495	0	1495
TCGA-FX-A3NJ-01	TCGA-FX-A3NJ	SARC	54	MALE	WHITE			Leiomyosarcoma (LMS)		2011		Alive	TUMOR FREE						Negative	R0	0	947	0	947	0	947	0	947
TCGA-FX-A3NK-01	TCGA-FX-A3NK	SARC	53	MALE	WHITE			Dedifferentiated liposarcoma		2011		Alive	TUMOR FREE						Negative	R0	0	505	0	505	0	505	0	505
TCGA-FX-A3RE-01	TCGA-FX-A3RE	SARC	65	FEMALE	WHITE			Leiomyosarcoma (LMS)		2011		Alive	TUMOR FREE						[Unknown]	RX	0	660	0	660	NA	NA	0	660
TCGA-FX-A3TO-01	TCGA-FX-A3TO	SARC	87	MALE	WHITE			Undifferentiated Pleomorphic Sarcoma (UPS)		2012		Alive	TUMOR FREE						Positive	R1	0	618	0	618	NA	NA	0	618
TCGA-FX-A48G-01	TCGA-FX-A48G	SARC	56	FEMALE	WHITE			Leiomyosarcoma (LMS)		2011		Dead	WITH TUMOR		Distant Metastasis	Lung			[Unknown]	RX	1	605	1	605	NA	NA	1	168
TCGA-FX-A48G-11	TCGA-FX-A48G	SARC	56	FEMALE	WHITE			Leiomyosarcoma (LMS)		2011		Dead	WITH TUMOR		Distant Metastasis	Lung			[Unknown]	RX	1	605	1	605	NA	NA	1	168
TCGA-FX-A76Y-01	TCGA-FX-A76Y	SARC	49	FEMALE	WHITE			Leiomyosarcoma (LMS)		2013		Alive	TUMOR FREE						Negative	R0	0	471	0	471	0	471	0	471
TCGA-FX-A8OO-01	TCGA-FX-A8OO	SARC	31	FEMALE	WHITE			Sarcoma; synovial; poorly differentiated		2013		Dead	TUMOR FREE						Negative	R0	1	245	0	245	0	245	0	245
TCGA-HB-A2OT-01	TCGA-HB-A2OT	SARC	78	FEMALE	BLACK OR AFRICAN AMERICAN			Undifferentiated Pleomorphic Sarcoma (UPS)		2009		Alive	TUMOR FREE						Negative	R0	0	2057	0	2057	0	2057	0	2057
TCGA-HB-A3L4-01	TCGA-HB-A3L4	SARC	46	FEMALE	WHITE			Leiomyosarcoma (LMS)		2009		Dead	WITH TUMOR		Distant Metastasis	Lung			Negative	R0	1	1061	1	1061	1	326	1	326
TCGA-HB-A3YV-01	TCGA-HB-A3YV	SARC	75	MALE	WHITE			Undifferentiated Pleomorphic Sarcoma (UPS)		2012		Dead	WITH TUMOR						Positive	R1	1	139	1	139	NA	NA	1	139
TCGA-HB-A43Z-01	TCGA-HB-A43Z	SARC	58	FEMALE	WHITE			Leiomyosarcoma (LMS)		2012		Alive	WITH TUMOR		Distant Metastasis	Lung			Negative	R0	0	1126	0	1126	1	894	1	894
TCGA-HB-A5W3-01	TCGA-HB-A5W3	SARC	58	FEMALE	WHITE			Leiomyosarcoma (LMS)		2010		Dead	WITH TUMOR						Negative	R0	1	384	1	384	NA	NA	1	384
TCGA-HS-A5N7-01	TCGA-HS-A5N7	SARC	67	FEMALE	[Not Evaluated]			Leiomyosarcoma (LMS)		NA		Alive	TUMOR FREE						Negative	R0	0	1013	0	1013	0	1013	0	1013
TCGA-HS-A5N8-01	TCGA-HS-A5N8	SARC	69	FEMALE	[Not Evaluated]			Leiomyosarcoma (LMS)		NA		Dead	WITH TUMOR						[Unknown]	R2	1	22	1	22	NA	NA	1	22
TCGA-HS-A5N9-01	TCGA-HS-A5N9	SARC	58	FEMALE	[Not Evaluated]			Leiomyosarcoma (LMS)		NA		Alive	TUMOR FREE						Negative	R0	0	1585	0	1585	0	1585	0	1585
TCGA-HS-A5NA-01	TCGA-HS-A5NA	SARC	65	FEMALE	[Not Evaluated]			Leiomyosarcoma (LMS)		NA		Alive	WITH TUMOR						[Unknown]	RX	0	298	0	298	NA	NA	0	298
TCGA-IE-A3OV-01	TCGA-IE-A3OV	SARC	42	MALE	WHITE			Leiomyosarcoma (LMS)		2004		Dead	WITH TUMOR		Distant Metastasis	Lung			Negative	R0	1	2448	1	2448	1	490	1	490
TCGA-IE-A4EH-01	TCGA-IE-A4EH	SARC	35	FEMALE	WHITE			Leiomyosarcoma (LMS)		2011		Alive	TUMOR FREE						Negative	R0	0	819	0	819	0	819	0	819
TCGA-IE-A4EI-01	TCGA-IE-A4EI	SARC	67	FEMALE	WHITE			Leiomyosarcoma (LMS)		2012		Alive	TUMOR FREE						Negative	R0	0	594	0	594	0	594	0	594
TCGA-IE-A4EJ-01	TCGA-IE-A4EJ	SARC	84	FEMALE	WHITE			Undifferentiated Pleomorphic Sarcoma (UPS)		2012		Alive	TUMOR FREE						Positive	R1	0	98	0	98	NA	NA	0	98
TCGA-IE-A4EK-01	TCGA-IE-A4EK	SARC	54	MALE	WHITE			Leiomyosarcoma (LMS)		2012		Alive							Positive	R1	0	42	0	42	NA	NA	0	42
TCGA-IE-A6BZ-01	TCGA-IE-A6BZ	SARC	65	FEMALE	WHITE			Undifferentiated Pleomorphic Sarcoma (UPS)		2012		Alive	TUMOR FREE						Negative	R0	0	605	0	605	0	605	0	605
TCGA-IF-A3RQ-01	TCGA-IF-A3RQ	SARC	70	FEMALE	WHITE			Dedifferentiated liposarcoma		1998		Dead	WITH TUMOR		Locoregional Recurrence	Other, specify	retroperitoneum		Negative	R0	1	1129	1	1129	1	441	1	441
TCGA-IF-A4AJ-01	TCGA-IF-A4AJ	SARC	80	MALE	WHITE			Leiomyosarcoma (LMS)		1995		Dead	WITH TUMOR		Distant Metastasis	Lung			Negative	R0	1	767	1	767	1	560	1	560
TCGA-IF-A4AJ-11	TCGA-IF-A4AJ	SARC	80	MALE	WHITE			Leiomyosarcoma (LMS)		1995		Dead	WITH TUMOR		Distant Metastasis	Lung			Negative	R0	1	767	1	767	1	560	1	560
TCGA-IF-A4AK-01	TCGA-IF-A4AK	SARC	82	FEMALE	WHITE			Leiomyosarcoma (LMS)		2010		Alive	TUMOR FREE						Negative	R0	0	1590	0	1590	0	1590	0	1590
TCGA-IS-A3K6-01	TCGA-IS-A3K6	SARC	55	FEMALE	WHITE			Leiomyosarcoma (LMS)		2000		Dead	WITH TUMOR							R2	1	858	1	858	NA	NA	1	858
TCGA-IS-A3K7-01	TCGA-IS-A3K7	SARC	63	FEMALE	WHITE			Leiomyosarcoma (LMS)		2000		Alive	TUMOR FREE		Distant Metastasis	Lung				R0	0	5204	0	5204	1	119	1	119
TCGA-IS-A3K8-01	TCGA-IS-A3K8	SARC	44	FEMALE	WHITE			Leiomyosarcoma (LMS)		2002		Alive	TUMOR FREE							R0	0	4845	0	4845	0	4845	0	4845
TCGA-IS-A3KA-01	TCGA-IS-A3KA	SARC	73	FEMALE	WHITE			Leiomyosarcoma (LMS)		2004		Dead	WITH TUMOR		Distant Metastasis	Lung				R0	1	413	1	413	1	76	1	76
TCGA-IW-A3M4-01	TCGA-IW-A3M4	SARC	48	FEMALE	WHITE			Leiomyosarcoma (LMS)		2005		Alive	TUMOR FREE		Locoregional Disease					R0	0	2615	0	2615	1	2207	1	2207
TCGA-IW-A3M5-01	TCGA-IW-A3M5	SARC	76	FEMALE	WHITE			Leiomyosarcoma (LMS)		2010		Dead	WITH TUMOR		Distant Metastasis	Lung			Negative	R0	1	180	1	180	1	9	1	9
TCGA-IW-A3M6-01	TCGA-IW-A3M6	SARC	59	FEMALE	ASIAN			Leiomyosarcoma (LMS)		2011		Alive	TUMOR FREE							R0	0	688	0	688	0	688	0	688
TCGA-JV-A5VE-01	TCGA-JV-A5VE	SARC	60	FEMALE	BLACK OR AFRICAN AMERICAN			Leiomyosarcoma (LMS)		2012		Alive	TUMOR FREE						Negative	R0	0	499	0	499	0	499	0	499
TCGA-DX-A8BT-01	TCGA-DX-A8BT	SARC	63	FEMALE	WHITE			Pleomorphic 'MFH' / Undifferentiated pleomorphic sarcoma		2011		Alive	TUMOR FREE		Locoregional Recurrence	Other, specify	Axilla		Positive	R1	0	1230	0	1230	NA	NA	1	668
TCGA-DX-A8BU-01	TCGA-DX-A8BU	SARC	58	MALE	WHITE			Pleomorphic 'MFH' / Undifferentiated pleomorphic sarcoma		2006		Dead	WITH TUMOR		Distant Metastasis	Lung			Positive	R1	1	1116	1	1116	NA	NA	1	107
TCGA-DX-A8BV-01	TCGA-DX-A8BV	SARC	57	MALE	WHITE			Myxofibrosarcoma		2004		Dead	WITH TUMOR		Locoregional Recurrence	Other, specify	Retroperitoneum		Negative	R0	1	1845	1	1845	1	357	1	357
TCGA-DX-A8BX-01	TCGA-DX-A8BX	SARC	52	MALE	WHITE			Pleomorphic 'MFH' / Undifferentiated pleomorphic sarcoma		2006		Dead	WITH TUMOR						Negative	R0	1	591	1	591	NA	NA	1	591
TCGA-DX-A8BZ-01	TCGA-DX-A8BZ	SARC	78	FEMALE	BLACK OR AFRICAN AMERICAN			Leiomyosarcoma (LMS)		2013		Dead	WITH TUMOR		Distant Metastasis	Lung			Positive	R0	1	200	1	200	1	90	1	90
TCGA-DX-AATS-01	TCGA-DX-AATS	SARC	72	MALE	WHITE			Pleomorphic 'MFH' / Undifferentiated pleomorphic sarcoma		2008		Dead	TUMOR FREE						Positive	R1	1	35	0	35	NA	NA	0	35
TCGA-DX-AB2E-01	TCGA-DX-AB2E	SARC	60	MALE	WHITE			Myxofibrosarcoma		2013		Alive	WITH TUMOR		Distant Metastasis	Lung			Positive	R0	0	541	0	541	1	132	1	132
TCGA-DX-AB2F-01	TCGA-DX-AB2F	SARC	76	FEMALE	WHITE			Dedifferentiated liposarcoma		2013		Alive	TUMOR FREE						Positive	R0	0	365	0	365	0	365	0	365
TCGA-DX-AB2G-01	TCGA-DX-AB2G	SARC	36	MALE	WHITE			Dedifferentiated liposarcoma		2013		Alive	TUMOR FREE						Negative	R0	0	478	0	478	0	478	0	478
TCGA-DX-AB2H-01	TCGA-DX-AB2H	SARC	80	FEMALE	WHITE			Dedifferentiated liposarcoma		2013		Alive	TUMOR FREE						Negative	R0	0	482	0	482	0	482	0	482
TCGA-DX-AB2J-01	TCGA-DX-AB2J	SARC	71	FEMALE	WHITE			Pleomorphic 'MFH' / Undifferentiated pleomorphic sarcoma		2006		Dead	WITH TUMOR						Positive	R1	1	1235	1	1235	NA	NA	1	1235
TCGA-DX-AB2L-01	TCGA-DX-AB2L	SARC	35	MALE	WHITE			Myxofibrosarcoma		2009		Alive	TUMOR FREE						Positive	R1	0	2007	0	2007	NA	NA	0	2007
TCGA-DX-AB2O-01	TCGA-DX-AB2O	SARC	78	FEMALE	WHITE			Pleomorphic 'MFH' / Undifferentiated pleomorphic sarcoma		2007		Alive	TUMOR FREE						Negative	R0	0	2619	0	2619	0	2619	0	2619
TCGA-DX-AB2P-01	TCGA-DX-AB2P	SARC	79	MALE	WHITE			Pleomorphic 'MFH' / Undifferentiated pleomorphic sarcoma		2005		Dead	WITH TUMOR		Locoregional Recurrence				Negative	R0	1	367	1	367	1	161	1	161
TCGA-DX-AB2Q-01	TCGA-DX-AB2Q	SARC	65	FEMALE	WHITE			Pleomorphic 'MFH' / Undifferentiated pleomorphic sarcoma		2009		Alive	TUMOR FREE		Distant Metastasis	Other, specify	inguinal lymph node		Negative	R0	0	2030	0	2030	1	490	1	490
TCGA-DX-AB2S-01	TCGA-DX-AB2S	SARC	53	FEMALE	WHITE			Myxofibrosarcoma		2005		Alive	TUMOR FREE						Negative	R0	0	280	0	280	0	280	0	280
TCGA-DX-AB2T-01	TCGA-DX-AB2T	SARC	54	FEMALE	BLACK OR AFRICAN AMERICAN			Myxofibrosarcoma		2008		Alive	TUMOR FREE		Distant Metastasis	Lung			Negative	R0	0	2369	0	2369	1	784	1	784
TCGA-DX-AB2V-01	TCGA-DX-AB2V	SARC	81	MALE	WHITE			Myxofibrosarcoma		2006		Alive	TUMOR FREE						Negative	R0	0	3241	0	3241	0	3241	0	3241
TCGA-DX-AB2W-01	TCGA-DX-AB2W	SARC	62	FEMALE	WHITE			Pleomorphic 'MFH' / Undifferentiated pleomorphic sarcoma		2006		Alive	TUMOR FREE						Negative	R0	0	3238	0	3238	0	3238	0	3238
TCGA-DX-AB2X-01	TCGA-DX-AB2X	SARC	73	FEMALE	WHITE			Pleomorphic 'MFH' / Undifferentiated pleomorphic sarcoma		2010		Dead	WITH TUMOR		Locoregional Recurrence				Negative	R0	1	404	1	404	1	111	1	111
TCGA-DX-AB2Z-01	TCGA-DX-AB2Z	SARC	87	FEMALE	WHITE			Pleomorphic 'MFH' / Undifferentiated pleomorphic sarcoma		2010		Alive	TUMOR FREE						Negative	R0	0	1533	0	1533	0	1533	0	1533
TCGA-DX-AB30-01	TCGA-DX-AB30	SARC	53	FEMALE	WHITE			Myxofibrosarcoma		2004		Dead	WITH TUMOR		Distant Metastasis	Lung			Negative	R0	1	695	1	695	1	504	1	504
TCGA-DX-AB32-01	TCGA-DX-AB32	SARC	51	MALE	WHITE			Myxofibrosarcoma		2006		Alive	TUMOR FREE						Negative	R0	0	3102	0	3102	0	3102	0	3102
TCGA-DX-AB35-01	TCGA-DX-AB35	SARC	65	MALE	WHITE			Dedifferentiated liposarcoma		2012		Alive	WITH TUMOR		Locoregional Recurrence	Other, specify	Retroperitoneum		Negative	R0	0	928	0	928	1	284	1	284
TCGA-DX-AB36-01	TCGA-DX-AB36	SARC	86	MALE	WHITE			Dedifferentiated liposarcoma		2008		Dead							Positive	R1	1	1825	NA	1825	NA	NA	0	1825
TCGA-DX-AB37-01	TCGA-DX-AB37	SARC	73	FEMALE	WHITE			Dedifferentiated liposarcoma		2003		Dead							Negative	R0	1	2575	NA	2575	0	2575	0	2575
TCGA-DX-AB3A-01	TCGA-DX-AB3A	SARC	80	MALE	WHITE			Dedifferentiated liposarcoma		2009		Dead	WITH TUMOR		Locoregional Recurrence				Negative	R0	1	978	1	978	1	533	1	533
TCGA-DX-AB3B-01	TCGA-DX-AB3B	SARC	28	FEMALE	WHITE			Synovial Sarcoma - Monophasic		2009		Alive	TUMOR FREE						Negative	R0	0	1548	0	1548	0	1548	0	1548
TCGA-DX-AB3C-01	TCGA-DX-AB3C	SARC	27	MALE	WHITE			Synovial Sarcoma - Monophasic		2008		Alive	WITH TUMOR		Distant Metastasis	Lung			Positive	R0	0	2169	0	2169	1	567	1	567
TCGA-FX-A2QS-01	TCGA-FX-A2QS	SARC	61	FEMALE	WHITE			Dedifferentiated liposarcoma		2011		Alive	TUMOR FREE						Negative	R0	0	1495	0	1495	0	1495	0	1495
TCGA-FX-A2QS-11	TCGA-FX-A2QS	SARC	61	FEMALE	WHITE			Dedifferentiated liposarcoma		2011		Alive	TUMOR FREE						Negative	R0	0	1495	0	1495	0	1495	0	1495
TCGA-FX-A3NJ-01	TCGA-FX-A3NJ	SARC	54	MALE	WHITE			Leiomyosarcoma (LMS)		2011		Alive	TUMOR FREE						Negative	R0	0	947	0	947	0	947	0	947
TCGA-FX-A3NK-01	TCGA-FX-A3NK	SARC	53	MALE	WHITE			Dedifferentiated liposarcoma		2011		Alive	TUMOR FREE						Negative	R0	0	505	0	505	0	505	0	505
TCGA-FX-A3RE-01	TCGA-FX-A3RE	SARC	65	FEMALE	WHITE			Leiomyosarcoma (LMS)		2011		Alive	TUMOR FREE						[Unknown]	RX	0	660	0	660	NA	NA	0	660
TCGA-FX-A3TO-01	TCGA-FX-A3TO	SARC	87	MALE	WHITE			Undifferentiated Pleomorphic Sarcoma (UPS)		2012		Alive	TUMOR FREE						Positive	R1	0	618	0	618	NA	NA	0	618
TCGA-FX-A48G-01	TCGA-FX-A48G	SARC	56	FEMALE	WHITE			Leiomyosarcoma (LMS)		2011		Dead	WITH TUMOR		Distant Metastasis	Lung			[Unknown]	RX	1	605	1	605	NA	NA	1	168
TCGA-FX-A48G-11	TCGA-FX-A48G	SARC	56	FEMALE	WHITE			Leiomyosarcoma (LMS)		2011		Dead	WITH TUMOR		Distant Metastasis	Lung			[Unknown]	RX	1	605	1	605	NA	NA	1	168
TCGA-FX-A76Y-01	TCGA-FX-A76Y	SARC	49	FEMALE	WHITE			Leiomyosarcoma (LMS)		2013		Alive	TUMOR FREE						Negative	R0	0	471	0	471	0	471	0	471
TCGA-FX-A8OO-01	TCGA-FX-A8OO	SARC	31	FEMALE	WHITE			Sarcoma; synovial; poorly differentiated		2013		Dead	TUMOR FREE						Negative	R0	1	245	0	245	0	245	0	245
TCGA-HB-A2OT-01	TCGA-HB-A2OT	SARC	78	FEMALE	BLACK OR AFRICAN AMERICAN			Undifferentiated Pleomorphic Sarcoma (UPS)		2009		Alive	TUMOR FREE						Negative	R0	0	2057	0	2057	0	2057	0	2057
TCGA-HB-A3L4-01	TCGA-HB-A3L4	SARC	46	FEMALE	WHITE			Leiomyosarcoma (LMS)		2009		Dead	WITH TUMOR		Distant Metastasis	Lung			Negative	R0	1	1061	1	1061	1	326	1	326
TCGA-HB-A3YV-01	TCGA-HB-A3YV	SARC	75	MALE	WHITE			Undifferentiated Pleomorphic Sarcoma (UPS)		2012		Dead	WITH TUMOR						Positive	R1	1	139	1	139	NA	NA	1	139
TCGA-HB-A43Z-01	TCGA-HB-A43Z	SARC	58	FEMALE	WHITE			Leiomyosarcoma (LMS)		2012		Alive	WITH TUMOR		Distant Metastasis	Lung			Negative	R0	0	1126	0	1126	1	894	1	894
TCGA-HB-A5W3-01	TCGA-HB-A5W3	SARC	58	FEMALE	WHITE			Leiomyosarcoma (LMS)		2010		Dead	WITH TUMOR						Negative	R0	1	384	1	384	NA	NA	1	384
TCGA-HS-A5N7-01	TCGA-HS-A5N7	SARC	67	FEMALE	[Not Evaluated]			Leiomyosarcoma (LMS)		NA		Alive	TUMOR FREE						Negative	R0	0	1013	0	1013	0	1013	0	1013
TCGA-HS-A5N8-01	TCGA-HS-A5N8	SARC	69	FEMALE	[Not Evaluated]			Leiomyosarcoma (LMS)		NA		Dead	WITH TUMOR						[Unknown]	R2	1	22	1	22	NA	NA	1	22
TCGA-HS-A5N9-01	TCGA-HS-A5N9	SARC	58	FEMALE	[Not Evaluated]			Leiomyosarcoma (LMS)		NA		Alive	TUMOR FREE						Negative	R0	0	1585	0	1585	0	1585	0	1585
TCGA-HS-A5NA-01	TCGA-HS-A5NA	SARC	65	FEMALE	[Not Evaluated]			Leiomyosarcoma (LMS)		NA		Alive	WITH TUMOR						[Unknown]	RX	0	298	0	298	NA	NA	0	298
TCGA-IE-A3OV-01	TCGA-IE-A3OV	SARC	42	MALE	WHITE			Leiomyosarcoma (LMS)		2004		Dead	WITH TUMOR		Distant Metastasis	Lung			Negative	R0	1	2448	1	2448	1	490	1	490
TCGA-IE-A4EH-01	TCGA-IE-A4EH	SARC	35	FEMALE	WHITE			Leiomyosarcoma (LMS)		2011		Alive	TUMOR FREE						Negative	R0	0	819	0	819	0	819	0	819
TCGA-IE-A4EI-01	TCGA-IE-A4EI	SARC	67	FEMALE	WHITE			Leiomyosarcoma (LMS)		2012		Alive	TUMOR FREE						Negative	R0	0	594	0	594	0	594	0	594
TCGA-IE-A4EJ-01	TCGA-IE-A4EJ	SARC	84	FEMALE	WHITE			Undifferentiated Pleomorphic Sarcoma (UPS)		2012		Alive	TUMOR FREE						Positive	R1	0	98	0	98	NA	NA	0	98
TCGA-IE-A4EK-01	TCGA-IE-A4EK	SARC	54	MALE	WHITE			Leiomyosarcoma (LMS)		2012		Alive							Positive	R1	0	42	0	42	NA	NA	0	42
TCGA-IE-A6BZ-01	TCGA-IE-A6BZ	SARC	65	FEMALE	WHITE			Undifferentiated Pleomorphic Sarcoma (UPS)		2012		Alive	TUMOR FREE						Negative	R0	0	605	0	605	0	605	0	605
TCGA-IF-A3RQ-01	TCGA-IF-A3RQ	SARC	70	FEMALE	WHITE			Dedifferentiated liposarcoma		1998		Dead	WITH TUMOR		Locoregional Recurrence	Other, specify	retroperitoneum		Negative	R0	1	1129	1	1129	1	441	1	441
TCGA-IF-A4AJ-01	TCGA-IF-A4AJ	SARC	80	MALE	WHITE			Leiomyosarcoma (LMS)		1995		Dead	WITH TUMOR		Distant Metastasis	Lung			Negative	R0	1	767	1	767	1	560	1	560
TCGA-IF-A4AJ-11	TCGA-IF-A4AJ	SARC	80	MALE	WHITE			Leiomyosarcoma (LMS)		1995		Dead	WITH TUMOR		Distant Metastasis	Lung			Negative	R0	1	767	1	767	1	560	1	560
TCGA-IF-A4AK-01	TCGA-IF-A4AK	SARC	82	FEMALE	WHITE			Leiomyosarcoma (LMS)		2010		Alive	TUMOR FREE						Negative	R0	0	1590	0	1590	0	1590	0	1590
TCGA-IS-A3K6-01	TCGA-IS-A3K6	SARC	55	FEMALE	WHITE			Leiomyosarcoma (LMS)		2000		Dead	WITH TUMOR							R2	1	858	1	858	NA	NA	1	858
TCGA-IS-A3K7-01	TCGA-IS-A3K7	SARC	63	FEMALE	WHITE			Leiomyosarcoma (LMS)		2000		Alive	TUMOR FREE		Distant Metastasis	Lung				R0	0	5204	0	5204	1	119	1	119
TCGA-IS-A3K8-01	TCGA-IS-A3K8	SARC	44	FEMALE	WHITE			Leiomyosarcoma (LMS)		2002		Alive	TUMOR FREE							R0	0	4845	0	4845	0	4845	0	4845
TCGA-IS-A3KA-01	TCGA-IS-A3KA	SARC	73	FEMALE	WHITE			Leiomyosarcoma (LMS)		2004		Dead	WITH TUMOR		Distant Metastasis	Lung				R0	1	413	1	413	1	76	1	76
TCGA-IW-A3M4-01	TCGA-IW-A3M4	SARC	48	FEMALE	WHITE			Leiomyosarcoma (LMS)		2005		Alive	TUMOR FREE		Locoregional Disease					R0	0	2615	0	2615	1	2207	1	2207
TCGA-IW-A3M5-01	TCGA-IW-A3M5	SARC	76	FEMALE	WHITE			Leiomyosarcoma (LMS)		2010		Dead	WITH TUMOR		Distant Metastasis	Lung			Negative	R0	1	180	1	180	1	9	1	9
TCGA-IW-A3M6-01	TCGA-IW-A3M6	SARC	59	FEMALE	ASIAN			Leiomyosarcoma (LMS)		2011		Alive	TUMOR FREE							R0	0	688	0	688	0	688	0	688
TCGA-JV-A5VE-01	TCGA-JV-A5VE	SARC	60	FEMALE	BLACK OR AFRICAN AMERICAN			Leiomyosarcoma (LMS)		2012		Alive	TUMOR FREE						Negative	R0	0	499	0	499	0	499	0	499
TCGA-JV-A5VF-01	TCGA-JV-A5VF	SARC	69	FEMALE	BLACK OR AFRICAN AMERICAN			Leiomyosarcoma (LMS)		2012		Dead	WITH TUMOR						Positive	R2	1	32	1	32	NA	NA	1	32
TCGA-JV-A75J-01	TCGA-JV-A75J	SARC	43	FEMALE	WHITE			Leiomyosarcoma (LMS)		2013		Dead	WITH TUMOR						Positive	R2	1	119	1	119	NA	NA	1	119
TCGA-K1-A3PN-02	TCGA-K1-A3PN	SARC	64	FEMALE	WHITE			Leiomyosarcoma (LMS)		2006		Alive	TUMOR FREE						Negative	R0	0	3080	0	3080	1	1033	1	1033
TCGA-K1-A3PN-01	TCGA-K1-A3PN	SARC	64	FEMALE	WHITE			Leiomyosarcoma (LMS)		2006		Alive	TUMOR FREE						Negative	R0	0	3080	0	3080	1	1033	1	1033
TCGA-K1-A3PO-01	TCGA-K1-A3PO	SARC	42	MALE	WHITE			Leiomyosarcoma (LMS)		2010		Alive	TUMOR FREE						Negative	R0	0	1622	0	1622	0	1622	0	1622
TCGA-K1-A3PO-11	TCGA-K1-A3PO	SARC	42	MALE	WHITE			Leiomyosarcoma (LMS)		2010		Alive	TUMOR FREE						Negative	R0	0	1622	0	1622	0	1622	0	1622
TCGA-K1-A42W-01	TCGA-K1-A42W	SARC	65	FEMALE	WHITE			Leiomyosarcoma (LMS)		2009		Alive	WITH TUMOR		Distant Metastasis	Liver			Negative	R0	0	1891	0	1891	1	826	1	826
TCGA-K1-A42X-02	TCGA-K1-A42X	SARC	62	FEMALE	WHITE			Leiomyosarcoma (LMS)		2003		Alive	WITH TUMOR		Locoregional Recurrence	Other, specify	adjeacent area		Negative	R0	0	3765	0	3765	1	2036	1	2036
TCGA-K1-A42X-01	TCGA-K1-A42X	SARC	62	FEMALE	WHITE			Leiomyosarcoma (LMS)		2003		Alive	WITH TUMOR		Locoregional Recurrence	Other, specify	adjeacent area		Negative	R0	0	3765	0	3765	1	2036	1	2036
TCGA-K1-A42X-11	TCGA-K1-A42X	SARC	62	FEMALE	WHITE			Leiomyosarcoma (LMS)		2003		Alive	WITH TUMOR		Locoregional Recurrence	Other, specify	adjeacent area		Negative	R0	0	3765	0	3765	1	2036	1	2036
TCGA-K1-A6RT-01	TCGA-K1-A6RT	SARC	48	MALE	WHITE			Leiomyosarcoma (LMS)		2012		Alive	WITH TUMOR		Distant Metastasis	Lung			Negative	R0	0	528	0	528	1	129	1	129
TCGA-K1-A6RU-01	TCGA-K1-A6RU	SARC	66	FEMALE	WHITE			Myxofibrosarcoma		2013		Dead	WITH TUMOR		Distant Metastasis	Bone			Positive	R1	1	711	1	711	NA	NA	1	142
TCGA-K1-A6RV-01	TCGA-K1-A6RV	SARC	67	MALE	WHITE			Leiomyosarcoma (LMS)		2013		Alive	WITH TUMOR						Positive	R1	0	158	0	158	NA	NA	0	158
TCGA-KD-A5QS-01	TCGA-KD-A5QS	SARC	55	FEMALE	WHITE			Leiomyosarcoma (LMS)		2009		Dead	WITH TUMOR		Distant Metastasis	Bone			[Unknown]	RX	1	1941	1	1941	NA	NA	1	351
TCGA-KD-A5QT-01	TCGA-KD-A5QT	SARC	69	FEMALE	[Not Evaluated]			Leiomyosarcoma (LMS)		2010		Alive	TUMOR FREE						Negative	R0	0	499	0	499	0	499	0	499
TCGA-KD-A5QU-01	TCGA-KD-A5QU	SARC	41	FEMALE	WHITE			Leiomyosarcoma (LMS)		2010		Dead	WITH TUMOR		Distant Metastasis	Lung			Negative	R0	1	1073	1	1073	1	1060	1	1060
TCGA-KF-A41W-01	TCGA-KF-A41W	SARC	71	FEMALE	WHITE			Leiomyosarcoma (LMS)		2012		Alive	TUMOR FREE						Negative	RX	0	356	0	356	NA	NA	0	356
TCGA-KF-A41W-11	TCGA-KF-A41W	SARC	71	FEMALE	WHITE			Leiomyosarcoma (LMS)		2012		Alive	TUMOR FREE						Negative	RX	0	356	0	356	NA	NA	0	356
TCGA-LI-A67I-01	TCGA-LI-A67I	SARC	75	FEMALE	WHITE			Myxofibrosarcoma		2013		Alive	TUMOR FREE		Distant Metastasis	Lung			Positive	RX	0	922	0	922	NA	NA	1	574
TCGA-LI-A9QH-01	TCGA-LI-A9QH	SARC	72	FEMALE	WHITE			Pleomorphic 'MFH' / Undifferentiated pleomorphic sarcoma		2013		Dead	TUMOR FREE		Distant Metastasis	Lung			Negative	R2	1	540	0	540	NA	NA	1	426
TCGA-MB-A5Y8-01	TCGA-MB-A5Y8	SARC	60	FEMALE	WHITE			Undifferentiated Pleomorphic Sarcoma (UPS)		2012		Alive	TUMOR FREE						Negative	R0	0	773	0	773	0	773	0	773
TCGA-MB-A5Y9-01	TCGA-MB-A5Y9	SARC	90	MALE	WHITE			Undifferentiated Pleomorphic Sarcoma (UPS)		2012		Alive	WITH TUMOR						Positive	R1	0	252	0	252	NA	NA	0	252
TCGA-MB-A5YA-01	TCGA-MB-A5YA	SARC	63	MALE	WHITE			Leiomyosarcoma (LMS)		2012		Alive	TUMOR FREE						Negative	R0	0	15	0	15	0	15	0	15
TCGA-MB-A8JK-01	TCGA-MB-A8JK	SARC	49	MALE	WHITE			Pleomorphic 'MFH' / Undifferentiated pleomorphic sarcoma		2013		Alive	TUMOR FREE						Negative	RX	0	661	0	661	NA	NA	0	661
TCGA-MB-A8JL-01	TCGA-MB-A8JL	SARC	53	FEMALE	WHITE			Leiomyosarcoma (LMS)		2013		Alive	TUMOR FREE						Negative	R0	0	600	0	600	0	600	0	600
TCGA-MJ-A68H-01	TCGA-MJ-A68H	SARC	57	FEMALE	BLACK OR AFRICAN AMERICAN			Leiomyosarcoma (LMS)		2013		Alive	TUMOR FREE						Negative	R0	0	456	0	456	0	456	0	456
TCGA-MJ-A68J-01	TCGA-MJ-A68J	SARC	55	FEMALE	BLACK OR AFRICAN AMERICAN			Myxofibrosarcoma		2012		Alive	WITH TUMOR		New Primary Tumor	Other, specify	Foot		Positive	R1	0	547	0	547	NA	NA	1	268
TCGA-MJ-A850-01	TCGA-MJ-A850	SARC	28	MALE	WHITE			Synovial Sarcoma - Monophasic		2013		Alive	TUMOR FREE							RX	0	681	0	681	NA	NA	0	681
TCGA-MO-A47P-01	TCGA-MO-A47P	SARC	37	FEMALE	ASIAN			Dedifferentiated liposarcoma		2012		Alive	TUMOR FREE							R0	0	352	0	352	0	352	0	352
TCGA-MO-A47R-01	TCGA-MO-A47R	SARC	75	FEMALE	ASIAN			Leiomyosarcoma (LMS)		2010		Dead	WITH TUMOR		Distant Metastasis	Brain				R0	1	318	1	318	1	259	1	259
TCGA-N1-A6IA-01	TCGA-N1-A6IA	SARC	41	FEMALE	BLACK OR AFRICAN AMERICAN			Leiomyosarcoma (LMS)		2011		Dead	WITH TUMOR		Distant Metastasis	Lung			[Unknown]	RX	1	224	1	224	NA	NA	1	116
TCGA-PC-A5DK-01	TCGA-PC-A5DK	SARC	63	MALE	WHITE			Leiomyosarcoma (LMS)		2004		Alive	TUMOR FREE						Negative	R0	0	3740	0	3740	0	3740	0	3740
TCGA-PC-A5DL-01	TCGA-PC-A5DL	SARC	67	MALE	WHITE			Leiomyosarcoma (LMS)		2004		Dead								RX	1	1142	NA	1142	NA	NA	0	1142
TCGA-PC-A5DM-01	TCGA-PC-A5DM	SARC	73	MALE	WHITE			Leiomyosarcoma (LMS)		2005		Dead							Positive	R1	1	193	NA	193	NA	NA	0	193
TCGA-PC-A5DN-01	TCGA-PC-A5DN	SARC	77	FEMALE	WHITE			Leiomyosarcoma (LMS)		2005		Dead	TUMOR FREE							R1	1	1175	0	1175	NA	NA	0	1175
TCGA-PC-A5DO-01	TCGA-PC-A5DO	SARC	59	FEMALE	WHITE			Leiomyosarcoma (LMS)		2006		Dead	WITH TUMOR						Negative	R1	1	2464	1	2464	NA	NA	1	2464
TCGA-PC-A5DP-01	TCGA-PC-A5DP	SARC	72	FEMALE	WHITE			Leiomyosarcoma (LMS)		2007		Dead	WITH TUMOR							R1	1	550	1	550	NA	NA	1	550
TCGA-PT-A8TR-01	TCGA-PT-A8TR	SARC	57	FEMALE	WHITE			Leiomyosarcoma (LMS)		2013		Alive	TUMOR FREE						Positive	R1	0	813	0	813	NA	NA	0	813
TCGA-QC-A6FX-01	TCGA-QC-A6FX	SARC	68	MALE	WHITE			Pleomorphic 'MFH' / Undifferentiated pleomorphic sarcoma		2013		Alive	TUMOR FREE						Negative	R0	0	637	0	637	0	637	0	637
TCGA-QC-A7B5-01	TCGA-QC-A7B5	SARC	75	MALE	WHITE			Pleomorphic 'MFH' / Undifferentiated pleomorphic sarcoma		2013		Alive	TUMOR FREE		New Primary Tumor	Other, specify	skin		Positive	RX	0	398	0	398	NA	NA	1	259
TCGA-QC-AA9N-01	TCGA-QC-AA9N	SARC	53	FEMALE	BLACK OR AFRICAN AMERICAN			Undifferentiated Pleomorphic Sarcoma (UPS)		2013		Alive	TUMOR FREE						Negative	RX	0	537	0	537	NA	NA	0	537
TCGA-QQ-A5V2-01	TCGA-QQ-A5V2	SARC	42	MALE	WHITE			Giant cell 'MFH' / Undifferentiated pleomorphic sarcoma with giant cells		2006		Alive							[Unknown]	R1	0	56	0	56	NA	NA	0	56
TCGA-QQ-A5V9-01	TCGA-QQ-A5V9	SARC	76	MALE	WHITE			Undifferentiated Pleomorphic Sarcoma (UPS)		1997		Dead	WITH TUMOR		Distant Metastasis	Lung			Negative	R0	1	1424	1	1424	1	405	1	405
TCGA-QQ-A5VA-01	TCGA-QQ-A5VA	SARC	60	FEMALE	WHITE			Dedifferentiated liposarcoma		1996		Dead	WITH TUMOR						Negative	RX	1	550	1	550	NA	NA	1	550
TCGA-QQ-A5VB-01	TCGA-QQ-A5VB	SARC	53	FEMALE	WHITE			Leiomyosarcoma (LMS)		1994		Dead	WITH TUMOR		Locoregional Recurrence	Other, specify	Left Pelvis		Positive	R1	1	1478	1	1478	NA	NA	1	111
TCGA-QQ-A5VC-01	TCGA-QQ-A5VC	SARC	63	FEMALE	WHITE			Leiomyosarcoma (LMS)		2011		Alive	TUMOR FREE						Negative	R0	0	1092	0	1092	0	1092	0	1092
TCGA-QQ-A5VD-01	TCGA-QQ-A5VD	SARC	52	MALE	WHITE			Leiomyosarcoma (LMS)		2011		Alive	TUMOR FREE						Negative	R0	0	1129	0	1129	0	1129	0	1129
TCGA-QQ-A8VB-01	TCGA-QQ-A8VB	SARC	68	FEMALE	WHITE			Malignant Peripheral Nerve Sheath Tumors (MPNST)		1998		Alive	TUMOR FREE		New Primary Tumor	Other, specify	gastrointestinal		Negative	RX	0	5723	0	5723	NA	NA	1	2682
TCGA-QQ-A8VD-01	TCGA-QQ-A8VD	SARC	56	MALE	WHITE			Desmoid Tumor		2003		Alive	WITH TUMOR		Locoregional Recurrence	Other, specify	left abdominal wall		Positive	RX	0	3964	0	3964	NA	NA	1	499
TCGA-QQ-A8VF-01	TCGA-QQ-A8VF	SARC	70	MALE	WHITE			Leiomyosarcoma (LMS)		2005		Alive	TUMOR FREE						Negative	RX	0	3406	0	3406	NA	NA	0	3406
TCGA-QQ-A8VG-01	TCGA-QQ-A8VG	SARC	52	MALE	WHITE			Malignant Peripheral Nerve Sheath Tumors (MPNST)		2009		Dead	WITH TUMOR		New Primary Tumor	Liver			Negative	RX	1	1970	1	1970	NA	NA	1	1852
TCGA-QQ-A8VH-01	TCGA-QQ-A8VH	SARC	31	FEMALE	WHITE			Malignant Peripheral Nerve Sheath Tumors (MPNST)		2010		Dead	WITH TUMOR		Locoregional Recurrence	Other, specify	Spine T6 to apical lung		Positive	RX	1	320	1	320	NA	NA	1	197
TCGA-RN-A68Q-01	TCGA-RN-A68Q	SARC	62	FEMALE	WHITE			Malignant Peripheral Nerve Sheath Tumors (MPNST)		2010		Alive	TUMOR FREE						[Unknown]	RX	0	22	0	22	NA	NA	0	22
TCGA-RN-AAAQ-01	TCGA-RN-AAAQ	SARC	52	MALE	WHITE			Malignant Peripheral Nerve Sheath Tumors (MPNST)		2013		Alive	WITH TUMOR		Locoregional Recurrence	Other, specify	Left Shoulder		[Unknown]		0	510	0	510	NA	NA	1	307
TCGA-SG-A6Z4-01	TCGA-SG-A6Z4	SARC	47	MALE	WHITE			Pleomorphic 'MFH' / Undifferentiated pleomorphic sarcoma		2013		Alive	WITH TUMOR		Distant Metastasis	Lung			Negative	R1	0	576	0	576	NA	NA	1	105
TCGA-SG-A6Z7-01	TCGA-SG-A6Z7	SARC	44	FEMALE	WHITE			Dedifferentiated liposarcoma		2004		Dead	TUMOR FREE						[Unknown]	RX	1	118	0	118	NA	NA	0	118
TCGA-SG-A849-01	TCGA-SG-A849	SARC	78	MALE	WHITE			Undifferentiated Pleomorphic Sarcoma (UPS)		2013		Alive	TUMOR FREE						Positive	R1	0	533	0	533	NA	NA	0	533
TCGA-SI-A71O-06	TCGA-SI-A71O	SARC	29	MALE	WHITE			Malignant Peripheral Nerve Sheath Tumors (MPNST)		2013		Dead	WITH TUMOR		Distant Metastasis	Lung			Positive	RX	1	694	1	694	NA	NA	1	264
TCGA-SI-A71O-01	TCGA-SI-A71O	SARC	29	MALE	WHITE			Malignant Peripheral Nerve Sheath Tumors (MPNST)		2013		Dead	WITH TUMOR		Distant Metastasis	Lung			Positive	RX	1	694	1	694	NA	NA	1	264
TCGA-SI-A71P-01	TCGA-SI-A71P	SARC	50	MALE	WHITE			Malignant Peripheral Nerve Sheath Tumors (MPNST)		2012		Alive	TUMOR FREE						[Unknown]	RX	0	771	0	771	NA	NA	0	771
TCGA-SI-A71Q-01	TCGA-SI-A71Q	SARC	34	FEMALE	BLACK OR AFRICAN AMERICAN			Malignant Peripheral Nerve Sheath Tumors (MPNST)		2012		Alive	TUMOR FREE						Negative	R0	0	996	0	996	0	996	0	996
TCGA-SI-AA8B-01	TCGA-SI-AA8B	SARC	80	FEMALE	WHITE			Undifferentiated Pleomorphic Sarcoma (UPS)		2013		Dead	WITH TUMOR						Positive	R1	1	262	1	262	NA	NA	1	262
TCGA-SI-AA8C-01	TCGA-SI-AA8C	SARC	20	FEMALE	WHITE			Malignant Peripheral Nerve Sheath Tumors (MPNST)		2013		Alive	WITH TUMOR		Distant Metastasis	Lung			Positive	R1	0	597	0	597	NA	NA	1	273
TCGA-UE-A6QT-01	TCGA-UE-A6QT	SARC	50	FEMALE	ASIAN			Undifferentiated Pleomorphic Sarcoma (UPS)		2013		Alive	TUMOR FREE						Negative	R0	0	402	0	402	0	402	0	402
TCGA-UE-A6QU-01	TCGA-UE-A6QU	SARC	90	FEMALE	ASIAN			Undifferentiated Pleomorphic Sarcoma (UPS)		2013		Alive	TUMOR FREE						Negative	R0	0	408	0	408	0	408	0	408
TCGA-VT-A80G-01	TCGA-VT-A80G	SARC	66	MALE	WHITE			Undifferentiated Pleomorphic Sarcoma (UPS)		2013		Alive	WITH TUMOR		Distant Metastasis	Lung			Negative	R0	0	326	0	326	1	26	1	26
TCGA-VT-A80J-02	TCGA-VT-A80J	SARC	49	FEMALE	WHITE			Undifferentiated Pleomorphic Sarcoma (UPS)		2012		Alive	TUMOR FREE		Distant Metastasis	Other, specify	inguinal lymph node		Negative	R0	0	796	0	796	1	355	1	355
TCGA-VT-A80J-01	TCGA-VT-A80J	SARC	49	FEMALE	WHITE			Undifferentiated Pleomorphic Sarcoma (UPS)		2012		Alive	TUMOR FREE		Distant Metastasis	Other, specify	inguinal lymph node		Negative	R0	0	796	0	796	1	355	1	355
TCGA-VT-AB3D-01	TCGA-VT-AB3D	SARC	71	MALE	WHITE			Undifferentiated Pleomorphic Sarcoma (UPS)		2013		Alive	TUMOR FREE						Negative	R0	0	379	0	379	0	379	0	379
TCGA-WK-A8XO-01	TCGA-WK-A8XO	SARC	66	FEMALE	WHITE			Dedifferentiated liposarcoma		2010		Dead	WITH TUMOR		Locoregional Recurrence	Other, specify	Abdominal		Negative	R0	1	363	1	363	1	105	1	105
TCGA-WK-A8XQ-01	TCGA-WK-A8XQ	SARC	57	MALE	WHITE			Dedifferentiated liposarcoma		2009		Dead	WITH TUMOR		Locoregional Recurrence	Other, specify	Abdominal/retroperitoneal		Positive	R2	1	146	1	146	NA	NA	1	27
TCGA-WK-A8XS-01	TCGA-WK-A8XS	SARC	58	FEMALE	WHITE			Leiomyosarcoma (LMS)		2008		Alive	TUMOR FREE						Negative	R0	0	2579	0	2579	0	2579	0	2579
TCGA-WK-A8XT-01	TCGA-WK-A8XT	SARC	40	FEMALE	WHITE			Synovial Sarcoma - Monophasic		2008		Dead	WITH TUMOR		Locoregional Recurrence	Other, specify	Flank		Negative	R0	1	1262	1	1262	1	599	1	599
TCGA-WK-A8XX-01	TCGA-WK-A8XX	SARC	70	MALE	WHITE			Leiomyosarcoma (LMS)		2007		Dead	WITH TUMOR		Locoregional Recurrence	Other, specify	Retroperitoneum		Negative	R0	1	1164	1	1164	1	111	1	111
TCGA-WK-A8XY-01	TCGA-WK-A8XY	SARC	53	FEMALE	WHITE			Leiomyosarcoma (LMS)		2007		Dead	WITH TUMOR		Locoregional Recurrence	Other, specify	Intraabdominal		Positive	R1	1	1991	1	1991	NA	NA	1	103
TCGA-WK-A8XZ-01	TCGA-WK-A8XZ	SARC	56	FEMALE	WHITE			Leiomyosarcoma (LMS)		2007		Dead	WITH TUMOR		Distant Metastasis	Other, specify	Scalp		Negative	R0	1	1722	1	1722	1	89	1	89
TCGA-WK-A8Y0-01	TCGA-WK-A8Y0	SARC	49	FEMALE	WHITE			Undifferentiated Pleomorphic Sarcoma (UPS)		2010		Dead	WITH TUMOR		Distant Metastasis	Lung			Negative	R0	1	688	1	688	1	111	1	111
TCGA-WP-A9GB-01	TCGA-WP-A9GB	SARC	59	FEMALE	WHITE			Leiomyosarcoma (LMS)		2012		Dead	WITH TUMOR		Distant Metastasis	Lung			Negative	RX	1	261	1	261	NA	NA	1	214
TCGA-X2-A95T-01	TCGA-X2-A95T	SARC	49	FEMALE	WHITE			Leiomyosarcoma (LMS)		2009		Alive	TUMOR FREE						Negative	R0	0	1927	0	1927	0	1927	0	1927
TCGA-X6-A7W8-01	TCGA-X6-A7W8	SARC	89	MALE	WHITE			Myxofibrosarcoma		2011		Dead	WITH TUMOR		Distant Metastasis	Lung			Positive	R1	1	804	1	804	NA	NA	1	146
TCGA-X6-A7WA-01	TCGA-X6-A7WA	SARC	90	FEMALE	WHITE			Leiomyosarcoma (LMS)		2012		Alive	TUMOR FREE						Positive	R1	0	1092	0	1092	NA	NA	0	1092
TCGA-X6-A7WB-01	TCGA-X6-A7WB	SARC	58	FEMALE	WHITE			Leiomyosarcoma (LMS)		2011		Dead	WITH TUMOR		Distant Metastasis	Lung			Positive	R1	1	550	1	550	NA	NA	1	104
TCGA-X6-A7WC-01	TCGA-X6-A7WC	SARC	74	MALE	WHITE			Leiomyosarcoma (LMS)		2011		Alive	TUMOR FREE		Distant Metastasis	Lung			Negative	R0	0	1379	0	1379	1	301	1	301
TCGA-X6-A7WD-01	TCGA-X6-A7WD	SARC	63	FEMALE	WHITE			Leiomyosarcoma (LMS)		2013		Alive	WITH TUMOR		Distant Metastasis	Lung			Negative	R0	0	938	0	938	1	558	1	558
TCGA-X6-A8C2-01	TCGA-X6-A8C2	SARC	56	MALE	WHITE			Undifferentiated Pleomorphic Sarcoma (UPS)		2012		Alive	WITH TUMOR		New Primary Tumor	Lung			Positive	R1	0	1070	0	1070	NA	NA	1	7
TCGA-X6-A8C3-01	TCGA-X6-A8C3	SARC	59	FEMALE	ASIAN			Myxofibrosarcoma		2013		Alive	TUMOR FREE						Positive	R1	0	583	0	583	NA	NA	0	583
TCGA-X6-A8C4-01	TCGA-X6-A8C4	SARC	70	FEMALE	WHITE			Undifferentiated Pleomorphic Sarcoma (UPS)		2013		Dead	WITH TUMOR		Distant Metastasis	Lung			Positive	R1	1	628	1	628	NA	NA	1	71
TCGA-X6-A8C5-01	TCGA-X6-A8C5	SARC	63	FEMALE	BLACK OR AFRICAN AMERICAN			Leiomyosarcoma (LMS)		2011		Alive	TUMOR FREE						Negative	R0	0	1547	0	1547	0	1547	0	1547
TCGA-X6-A8C6-01	TCGA-X6-A8C6	SARC	55	MALE	WHITE			Myxofibrosarcoma		2011		Dead	WITH TUMOR		Distant Metastasis	Bone	& leg, opposite thigh		Positive	R1	1	1067	1	1067	NA	NA	1	408
TCGA-X6-A8C7-01	TCGA-X6-A8C7	SARC	24	FEMALE	WHITE			Synovial Sarcoma - Biphasic		2013		Alive	TUMOR FREE						Negative	R0	0	896	0	896	0	896	0	896
TCGA-X9-A971-01	TCGA-X9-A971	SARC	52	FEMALE	WHITE			Leiomyosarcoma (LMS)		2013		Alive	WITH TUMOR		Distant Metastasis	Lung			Negative	R0	0	831	0	831	1	224	1	224
TCGA-X9-A973-01	TCGA-X9-A973	SARC	55	MALE	WHITE			Undifferentiated Pleomorphic Sarcoma (UPS)		2011		Alive	WITH TUMOR		Distant Metastasis	Lung			Negative	R0	0	1108	0	1108	1	119	1	119
TCGA-Z4-A8JB-01	TCGA-Z4-A8JB	SARC	24	FEMALE	WHITE			Desmoid Tumor		2013		Alive	TUMOR FREE						Negative	R0	0	133	0	133	0	133	0	133
TCGA-Z4-A9VC-01	TCGA-Z4-A9VC	SARC	37	MALE	WHITE			Dedifferentiated liposarcoma		2013		Alive	TUMOR FREE						Negative	R0	0	407	0	407	0	407	0	407
TCGA-Z4-AAPF-01	TCGA-Z4-AAPF	SARC	35	FEMALE	WHITE			Sarcoma; synovial; poorly differentiated		2013		Alive	TUMOR FREE						Negative	R0	0	485	0	485	0	485	0	485
TCGA-Z4-AAPG-01	TCGA-Z4-AAPG	SARC	64	FEMALE	WHITE			Undifferentiated Pleomorphic Sarcoma (UPS)		2013		Alive	TUMOR FREE						Negative	R0	0	486	0	486	0	486	0	486
OS, overall survival; DSS, disease‑specific survival; DFI, disease‑free interval; PFI, platinum‑free interval.
